# Supplementary material for: Design of a bioactive small molecule that targets r(AUUCU) repeats in spinocerebellar ataxia 10
Source: PubMed Central journal article supplement (PMC4895354; doi:10.1038/ncomms11647), 2016-06-01
Supplement: ncomms11647-s1.pdf [file ncomms11647-s1.pdf]

## Supplementary Figures

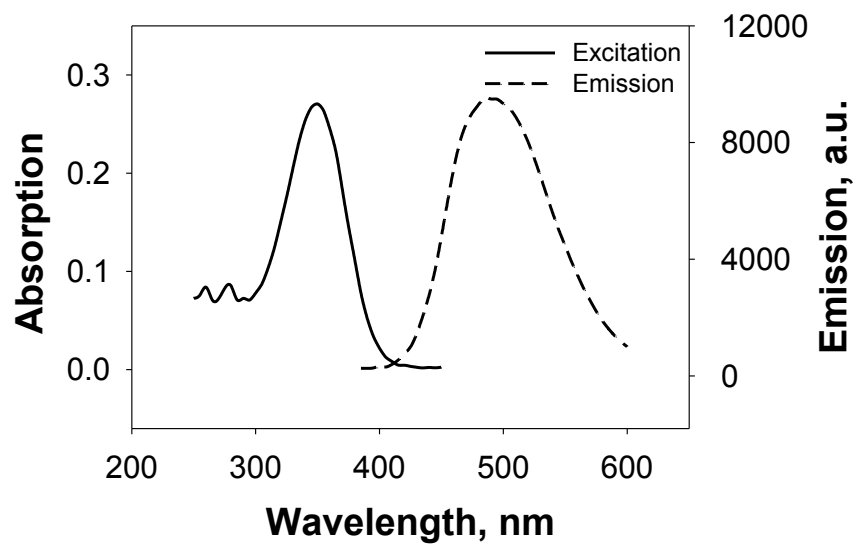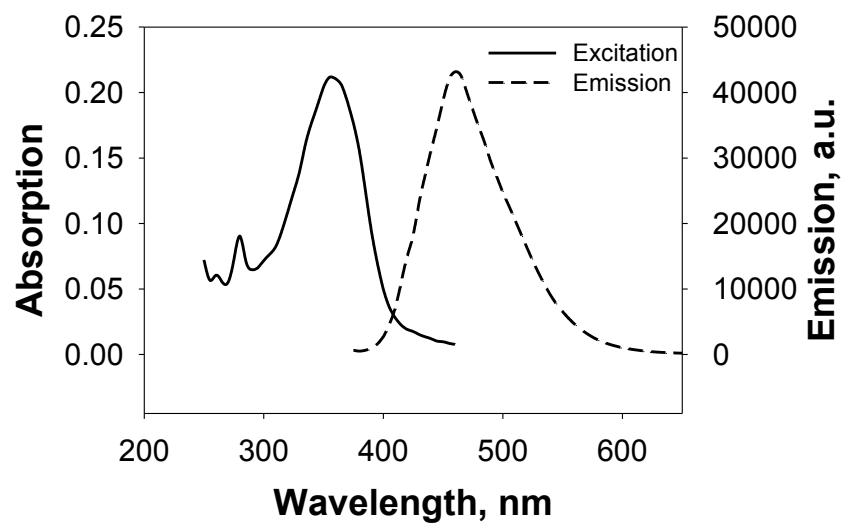

Supplementary Figure 1. Excitation and emission spectra of compound 1 (top) and 2 (bottom).

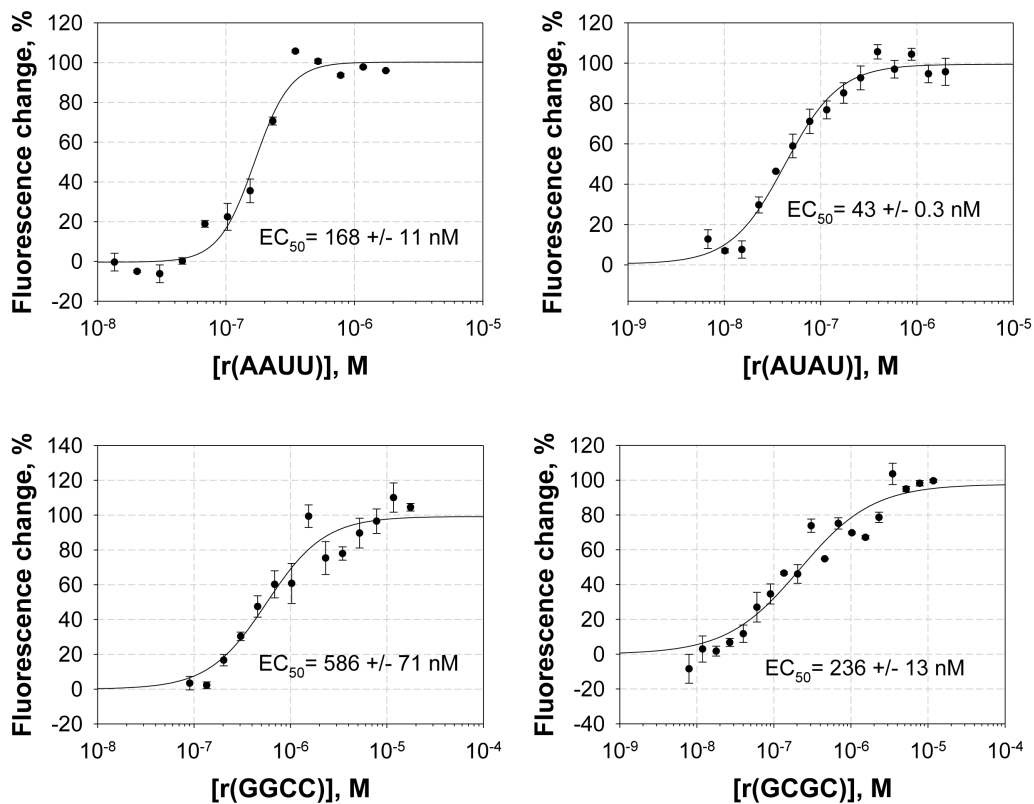

**Supplementary Figure 2.** Representative binding curves for compound **1** and r(AAUU), r(AUAU), r(GGCC) or r(GCGC) stretches ( $[1] = 3 \mu\text{M}$ ).

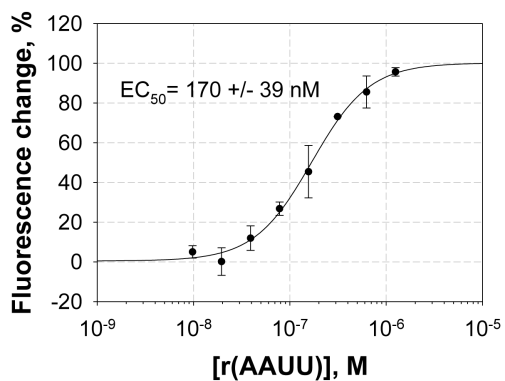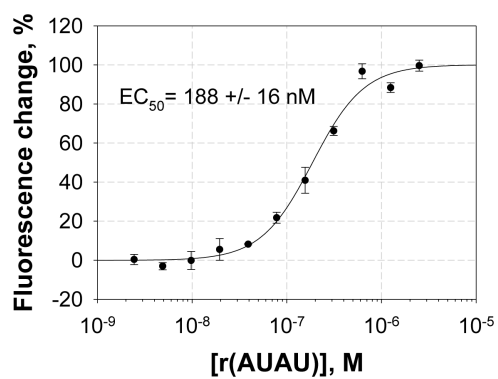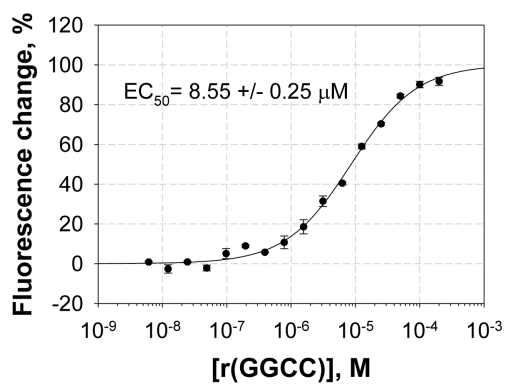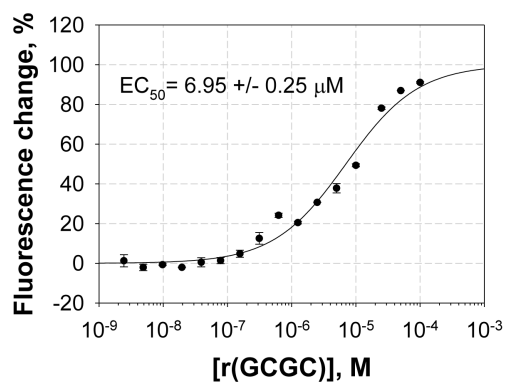

**Supplementary Figure 3.** Representative binding curves for compound **2** and r(AAUU), r(AUAU), r(GGCC) or r(GCGC) stretches ([**2**] = 1  $\mu\text{M}$ ).

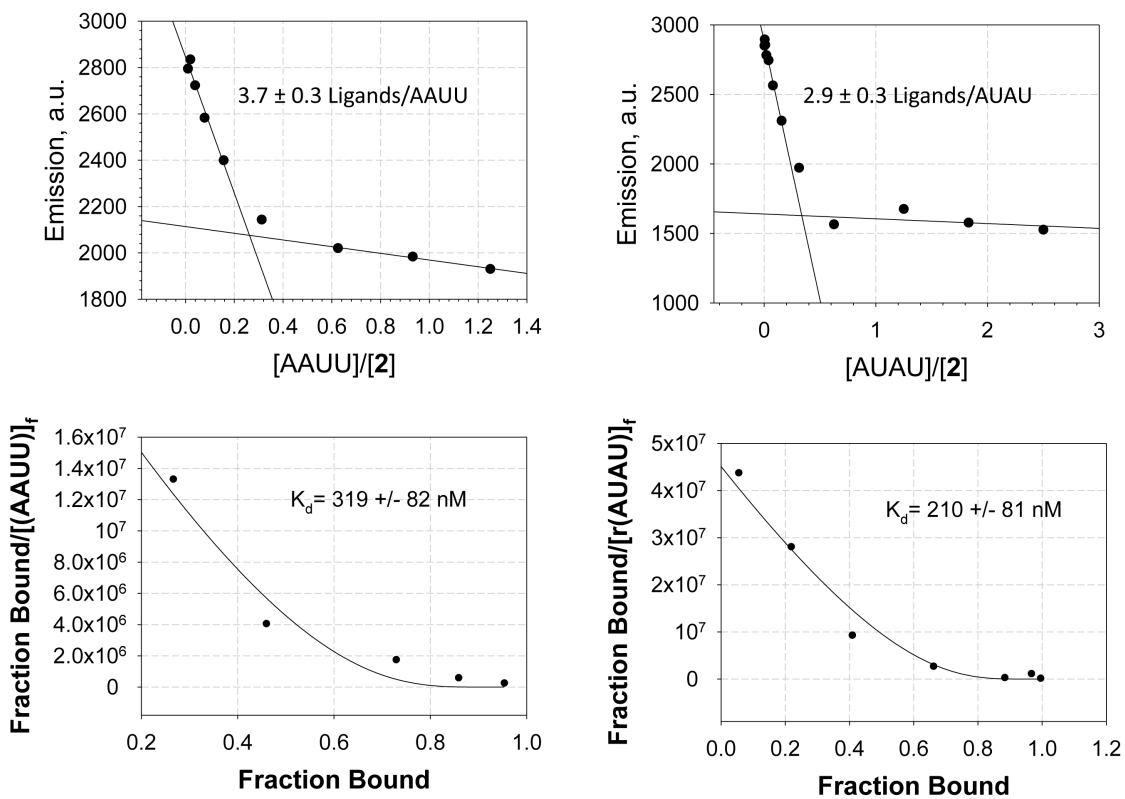

**Supplementary Figure 4.** Stoichiometries and  $K_d$ s for compound **2** binding to r(AAUU) and r(AUAU) stretches.

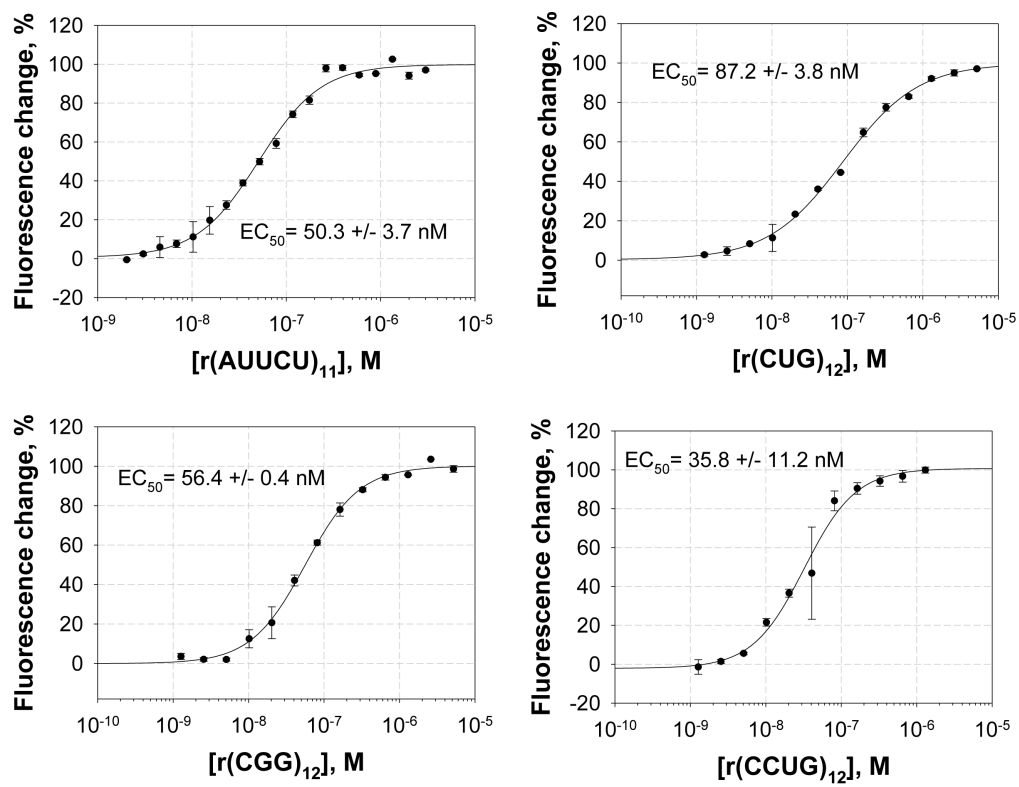

**Supplementary Figure 5.** Representative binding curves for compound **1** and  $r(AUUCU)_{11}$ ,  $r(CUG)_{12}$ ,  $r(CGG)_{12}$  and  $r(CCUG)_{12}$  ( $[1] = 3 \mu M$ ).

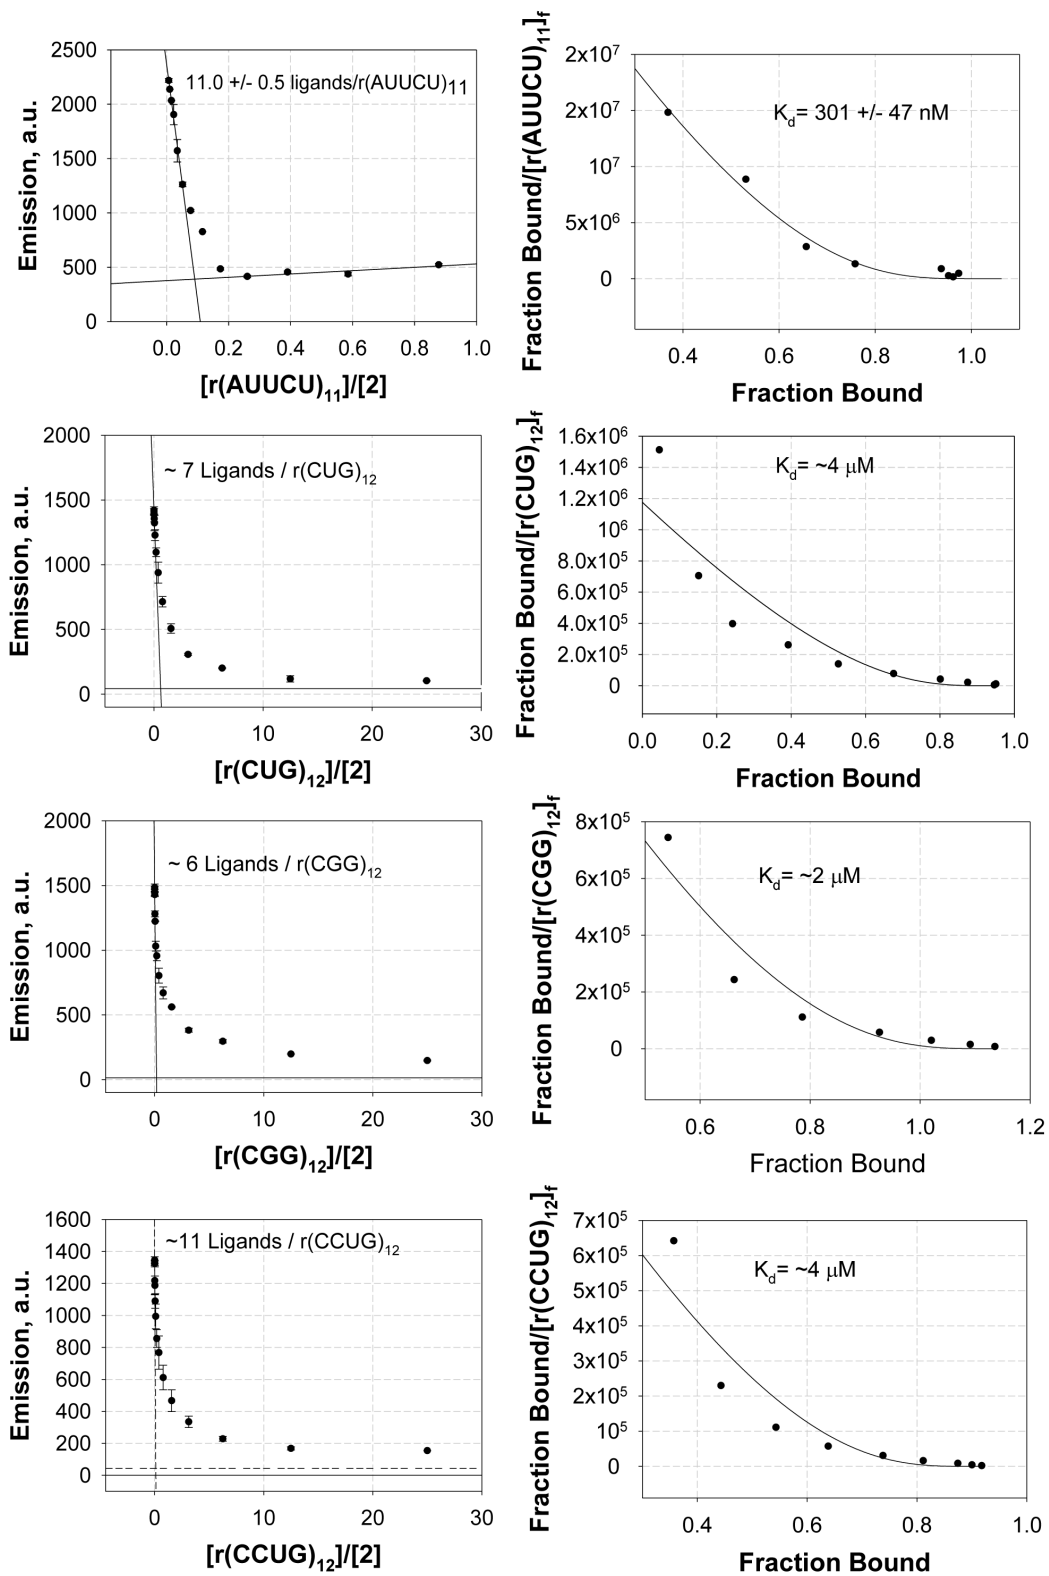

**Supplementary Figure 6.** Binding data (stoichiometries and  $K_d$ s) for **2** binding to  $r(\text{AUUCU})_{11}$ ,  $r(\text{CUG})_{12}$ ,  $r(\text{CGG})_{12}$  and  $r(\text{CCUG})_{12}$  ( $[2] = 1 \mu\text{M}$ ).

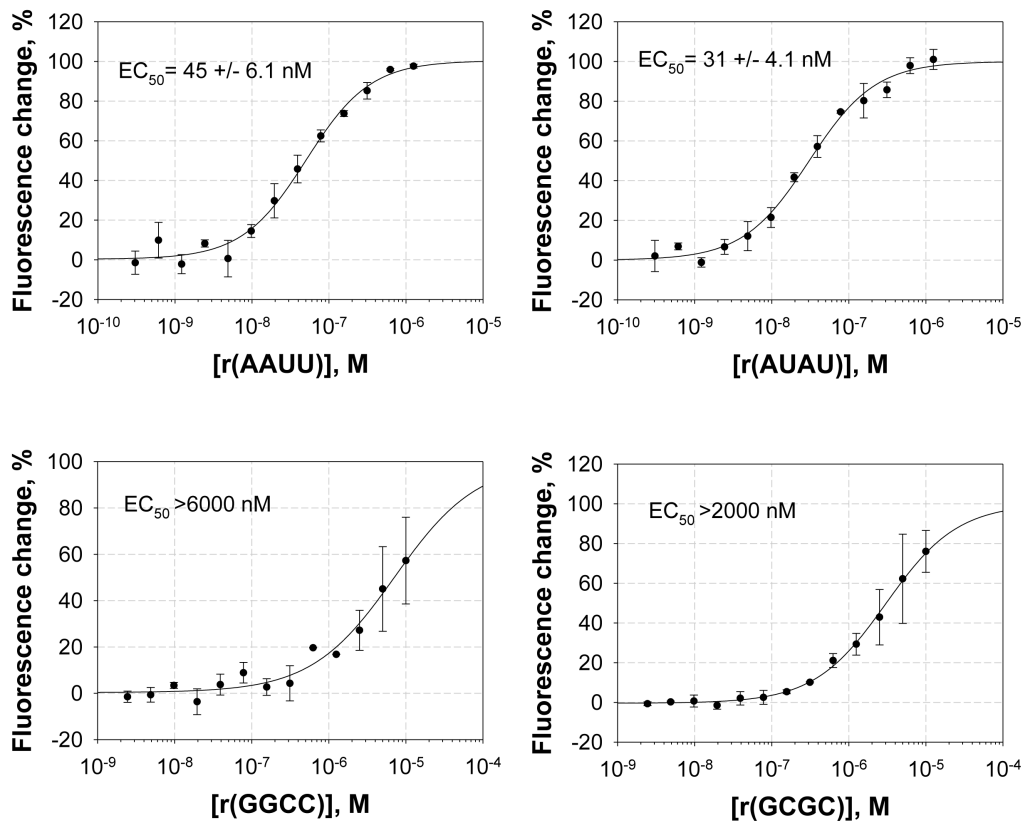

**Supplementary Figure 7.** Representative binding curves for compound **AU-azide** and r(AAUU), r(AUAU), r(GGCC) or r(GCGC) stretches ([**AU-azide**]= 1  $\mu$ M).

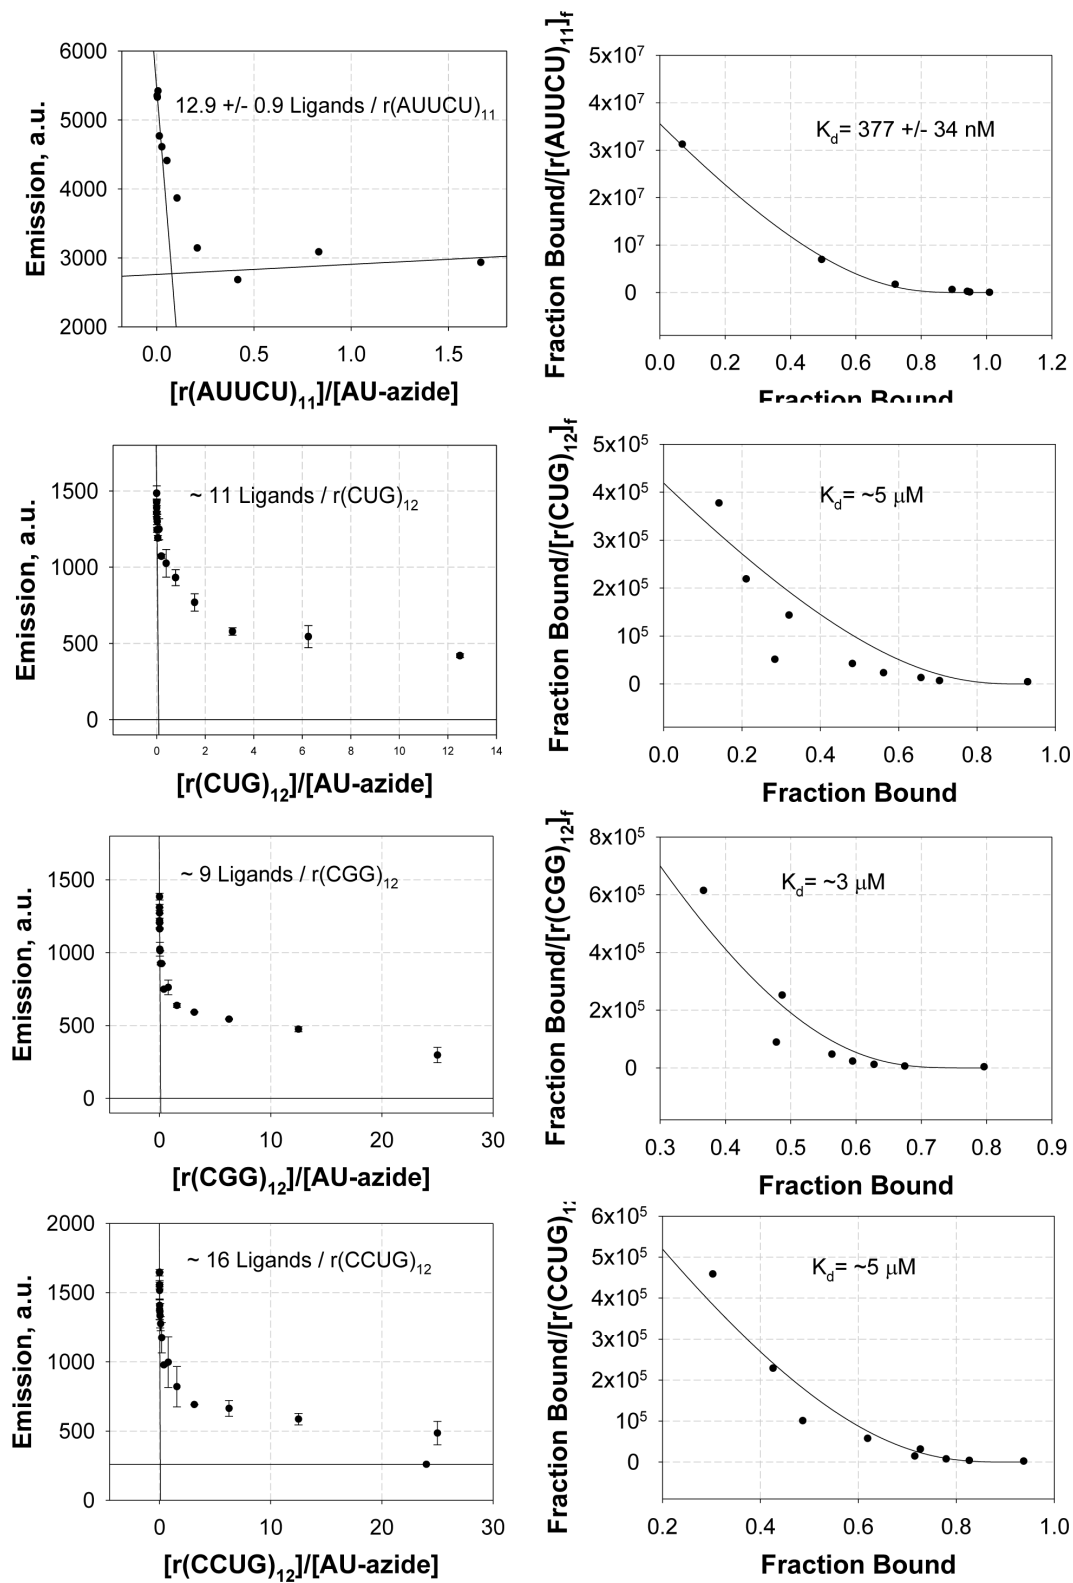

**Supplementary Figure 8.** Binding data (stoichiometry and  $K_d$ ) for **AU-azide** binding to  $r(\text{AUUCU})_{11}$ ,  $r(\text{CUG})_{12}$ ,  $r(\text{CGG})_{12}$  and  $r(\text{CCUG})_{12}$  ( $[\text{AU-azide}] = 1$   $\mu\text{M}$ ).



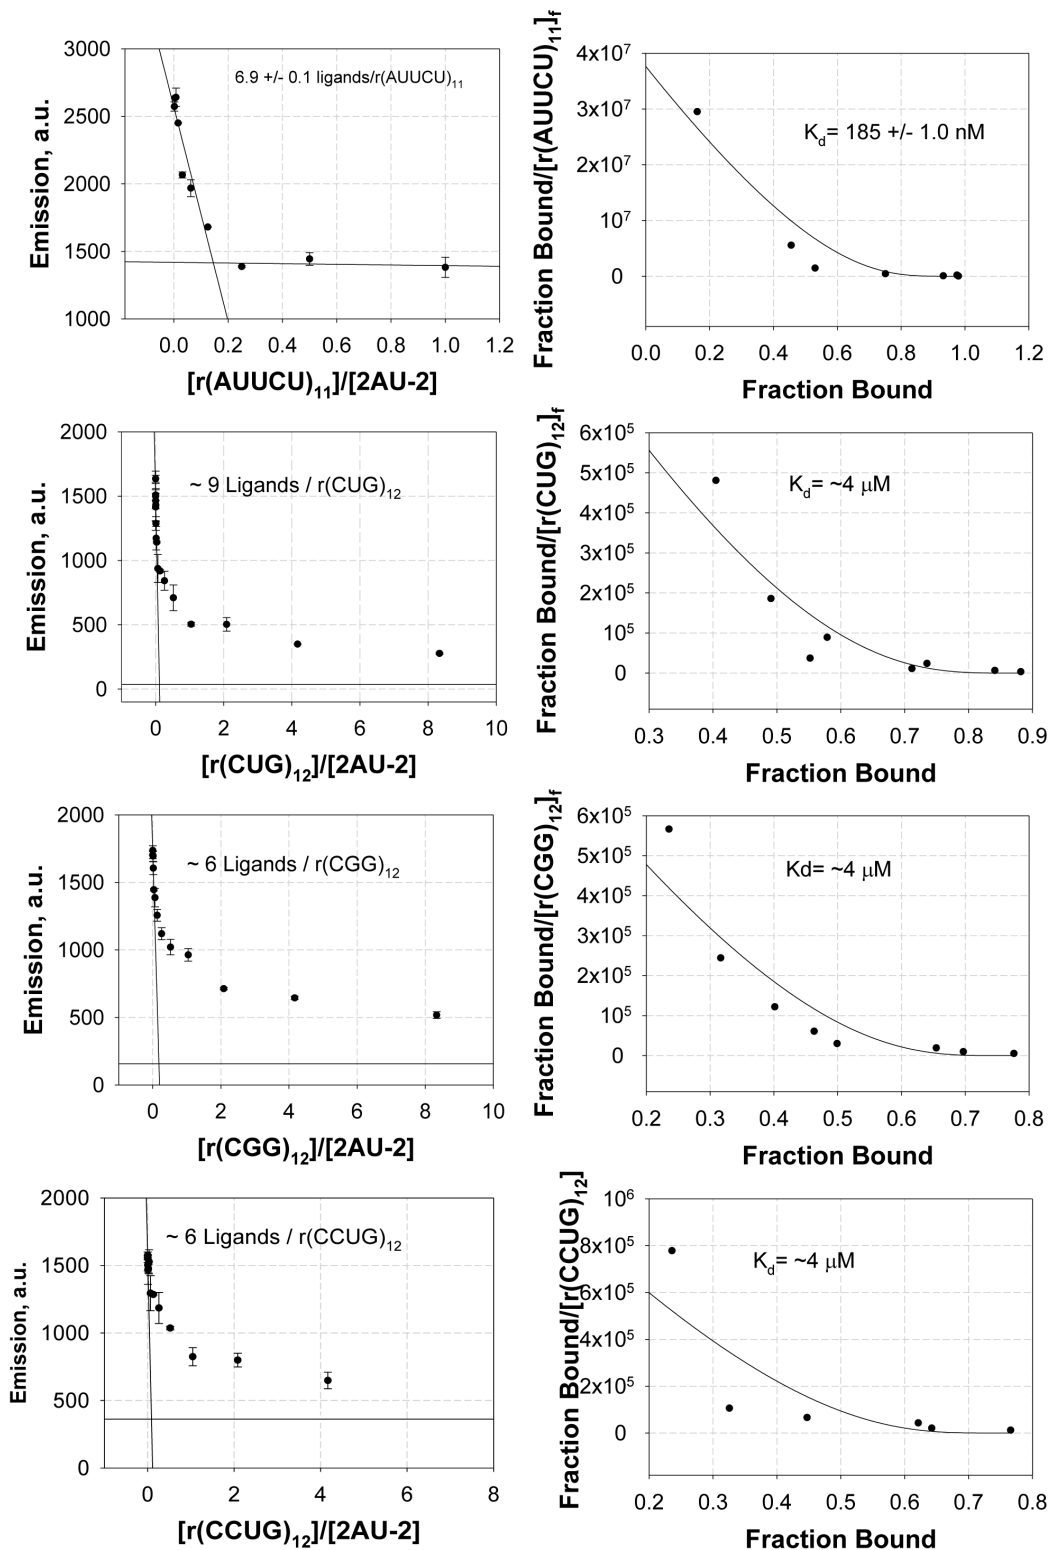

**Supplementary Figure 9.** Binding data (stoichiometries and  $K_d$ s) for compound **2AU-2** binding to  $r(\text{AUUCU})_{11}$ ,  $r(\text{CUG})_{12}$ ,  $r(\text{CGG})_{12}$  and  $r(\text{CCUG})_{12}$  ( $[2\text{AU-2}] = 3 \mu\text{M}$ ).

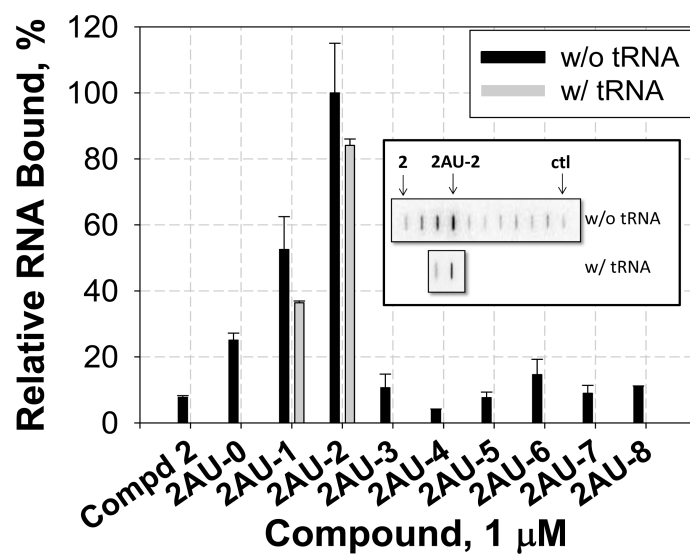

**Supplementary Figure 10.** Quantification of the filter binding assay results for screening dimeric compounds and images of nitrocellulose membranes (inset). Where indicated, 35-fold molar excess of tRNA was used (gray bars).

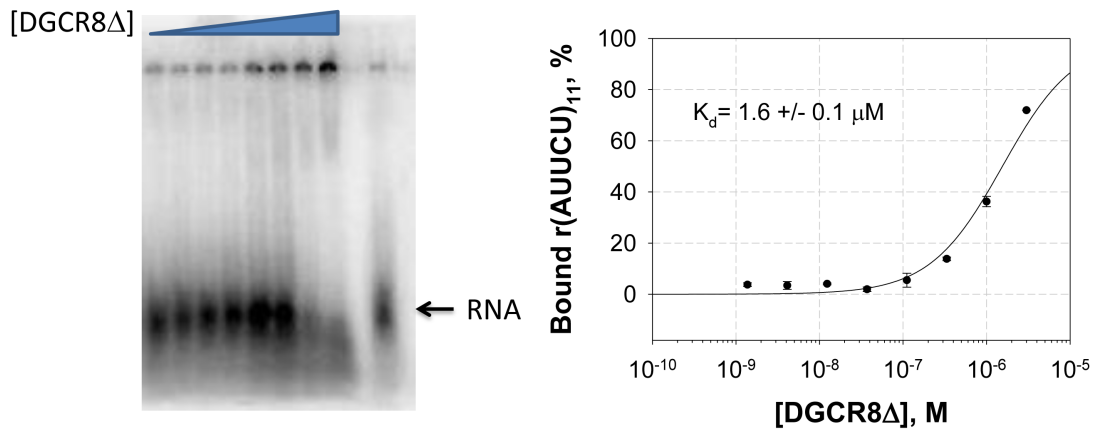

**Supplementary Figure 11.** Representative gel image of the binding of r(AUUCU)<sub>11</sub> to DGCR8Δ (left) and its quantification.

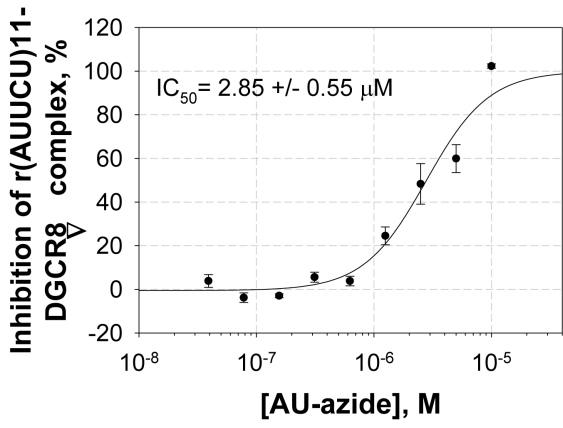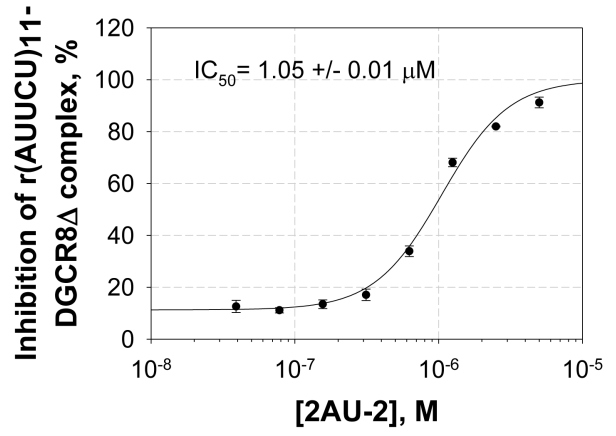

**Supplementary Figure 12.** IC<sub>50</sub> of **2AU-2** and **AU-azide** for inhibiting binding of DGCR8Δ.

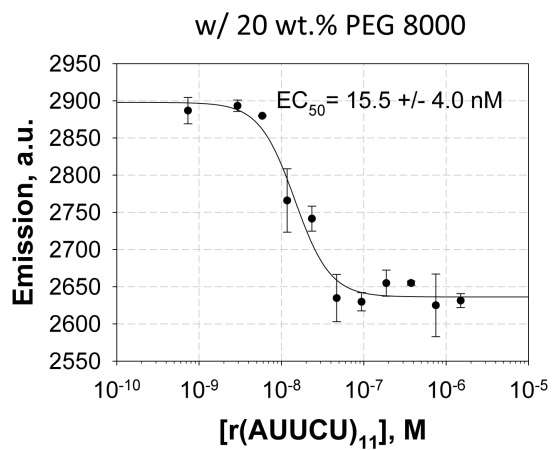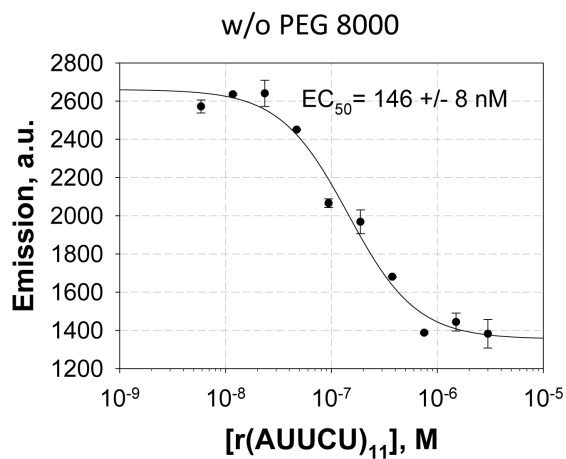

**Supplementary Figure 13.** Binding of **2AU-2** to  $r(\text{AUUCU})_{11}$  under molecularly crowded conditions.

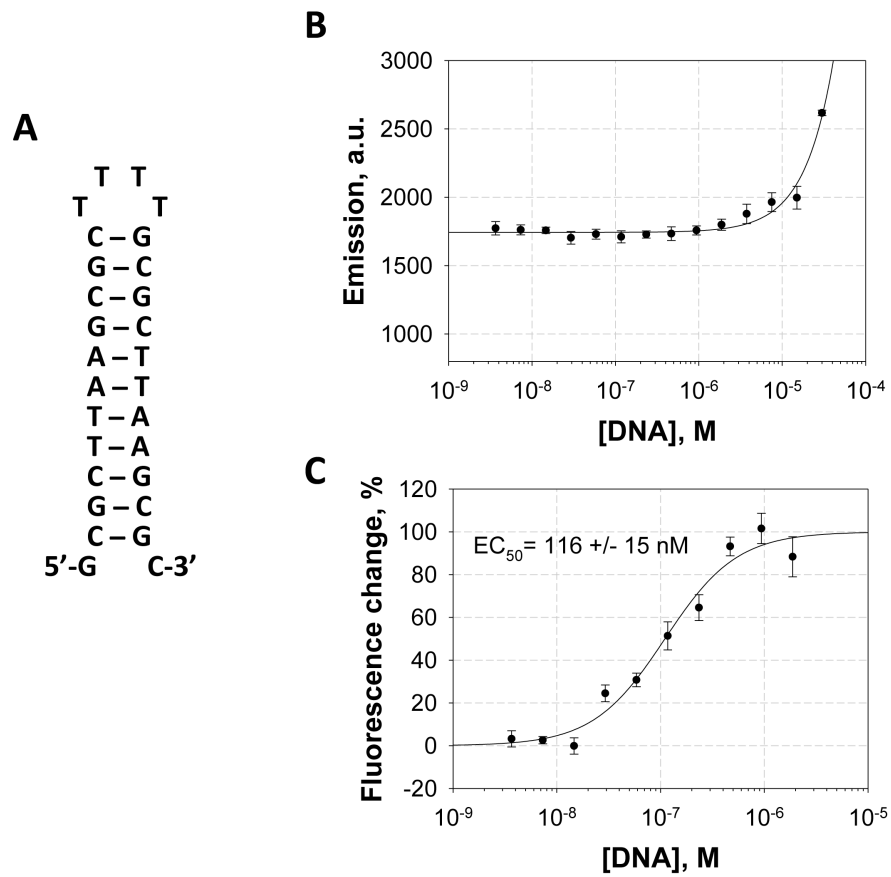

**Supplementary Figure 14.** The secondary structure of DNA (left) and the binding titration curve of **2AU-2** to the DNA (right). Saturable binding for **2AU-2** is not observed. [Compound]= 3  $\mu$ M.

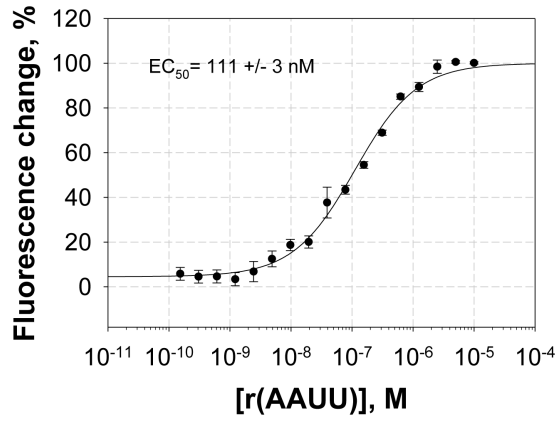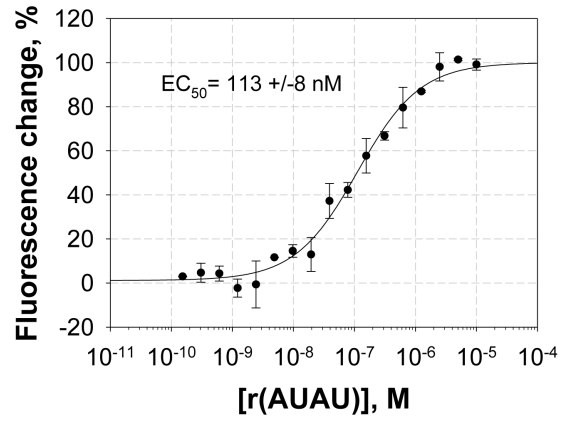

Supplementary Figure 15.  $EC_{50}$ s of AU-azide to r(AAUU) and r(AUAU). [Compound]=  $3 \mu\text{M}$ .

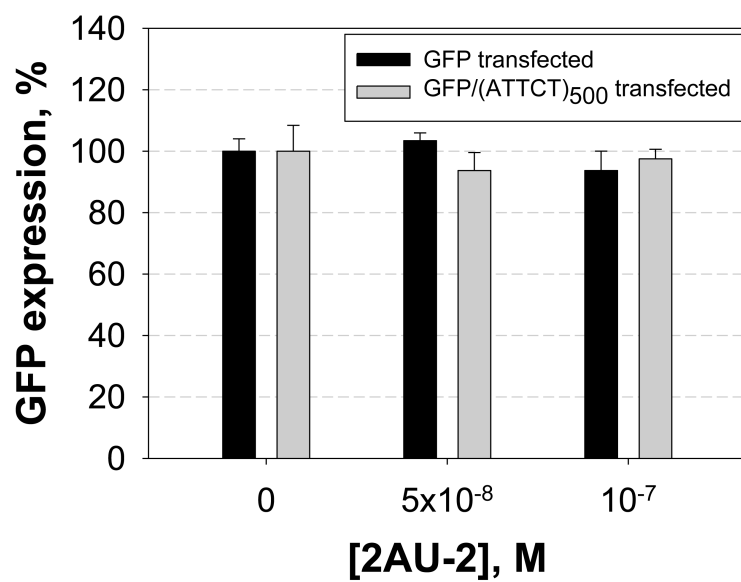

**Supplementary Figure 16.** Relative green fluorescent protein (GFP) expression measured by GFP fluorescence upon exposure to **2AU-2** compound. These data show that the compound has no effect on translation.



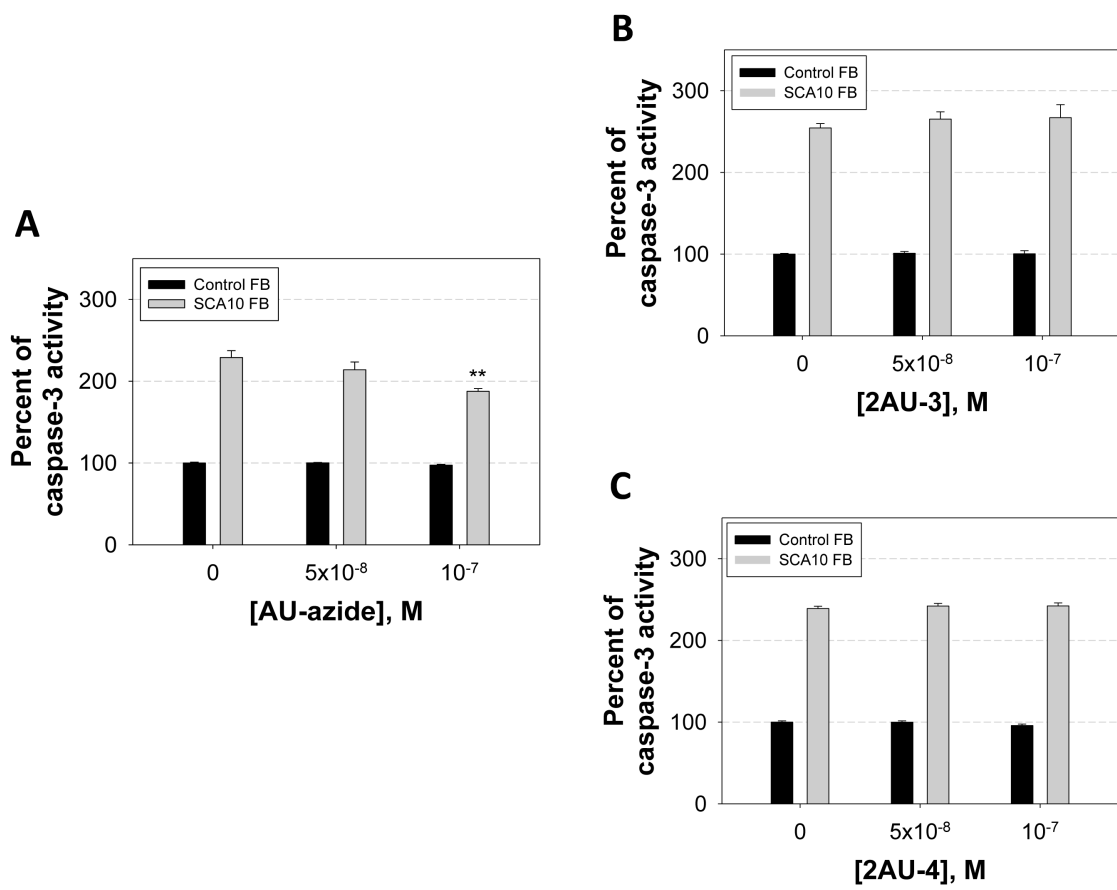

**Supplementary Figure 17.** Relative caspase-3 activities in normal and SCA10 fibroblasts before and after treatment with control compounds. **A**, AU-azide; **B**, 2AU-3; and **C**, 2AU-4.

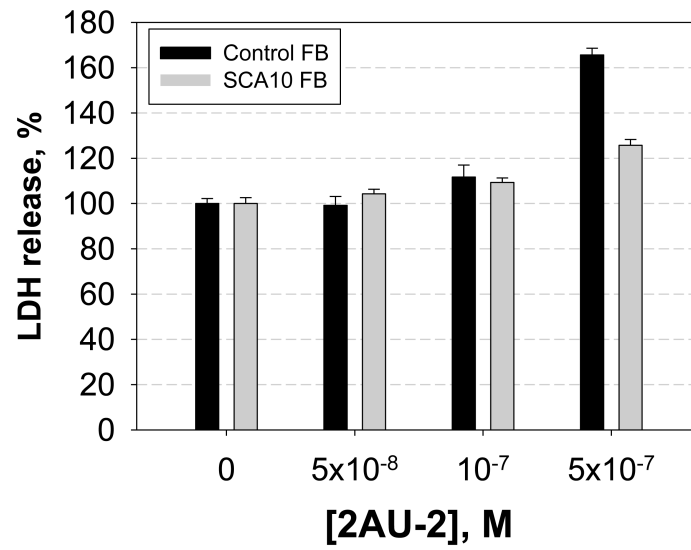

**Supplementary Figure 18.** Cytotoxicity of **2AU-2** by measuring released LDH.

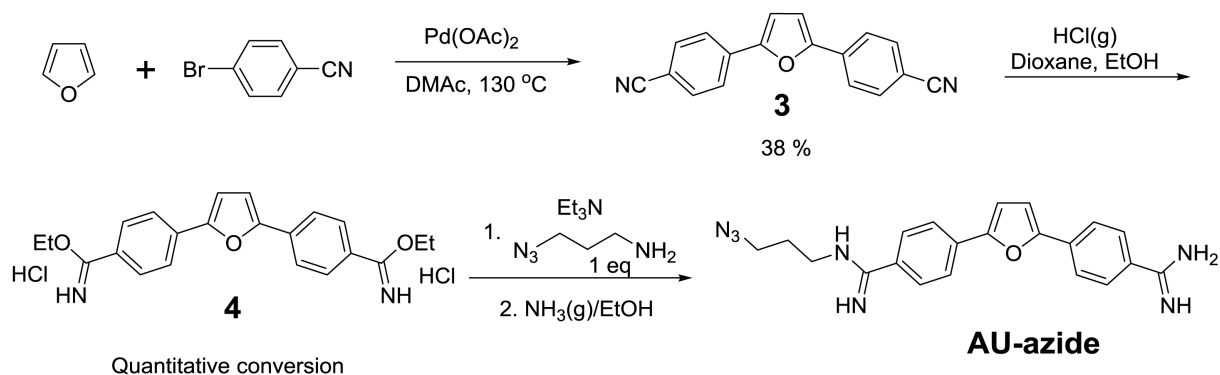

**Supplementary Figure 19. Synthesis of AU-azide.**

**4,4'-(Furan-2,5-diyl)dibenzonitrile (3).** To a mixture of 4-bromobenzonitrile (5.5 mmoles) in 20 mL N,N-dimethylacetamide (DMAc) in a sealing tube were added furan (2.8 mmoles), KOAc (11 mmoles) and 0.5% Pd(OAc)<sub>2</sub>. The reaction was stirred at 130 °C overnight and the solvent was removed under reduced pressure. The product (38% yield) was isolated by flash silica gel column chromatography with 6-40% ethyl acetate (EtOAc)/ hexanes (Hex) of eluent solvent.<sup>1</sup>

**Diethyl 4,4'-(furan-2,5-diyl)dibenzimidate hydrochloride (4).** 4,4'-(Furan-2,5-diyl)dibenzonitrile was dissolved in the mixture of 1,4-dioxane and ethanol (EtOH) and HCl gas was bubbled into the solution at 0 °C for X h. The solvent was removed under vacuo and the product was obtained in quantitative yield.<sup>2</sup>

**N-(3-Azidopropyl)-4-(5-(4-carbamimidoylphenyl)furan-2-yl)benzimidamide (AU-azide).**

Diethyl 4,4'-(furan-2,5-diyl)dibenzimidate hydrochloride (2.1 mmoles) and Et<sub>3</sub>N (5.25 mmoles) were dissolved in 25 mL EtOH and 3-azidopropylamine (2.1 mmoles) in 25 mL EtOH was added dropwise over 30 min. The mixture was stirred at room temperature overnight. Then, NH<sub>3</sub> gas was bubbled into the solution at 0 °C for 3 h. The solution was transferred to a sealing tube and

stirred at room temperature for 4 days. After removing the solvent under vacuo, the product was isolated by preparative HPLC (10-100% methanol (MeOH)/H<sub>2</sub>O with 0.1% trifluoroacetic acid (TFA) for 60 min.). <sup>1</sup>H-NMR (400 MHz, DMSO-d<sub>6</sub>) δ 1.93 (2Hs, tt, *J*= 6.8 Hz, *J*= 6.4 Hz), 3.47 (2Hs, t, *J*= 6.4 Hz), 3.52 (2Hs, t, *J*= 6.8 Hz), 7.46 (2Hs, m), 7.85 (2Hs, d, *J*= 8.8 Hz), 7.93 (2Hs, d, *J*= 8.4 Hz), 8.11 (4Hs, d, *J*= 8.4 Hz), 9.08 (1H, s), 9.17 (1H, s), 9.36 (1H, s), 9.53 (1H, s), 9.79 (1H, m); <sup>13</sup>C-NMR (400 MHz, DMSO-d<sub>6</sub>) δ 26.58, 48.20, 111.56, 111.75, 123.80, 123.84, 126.70, 127.71, 128.98, 129.06, 133.87, 134.28, 152.37, 152.49, 162.70, 164.83; HRMS (ESI<sup>+</sup>) calculated for C<sub>21</sub>H<sub>22</sub>N<sub>7</sub>O: 388.1886, found: 388.1876.

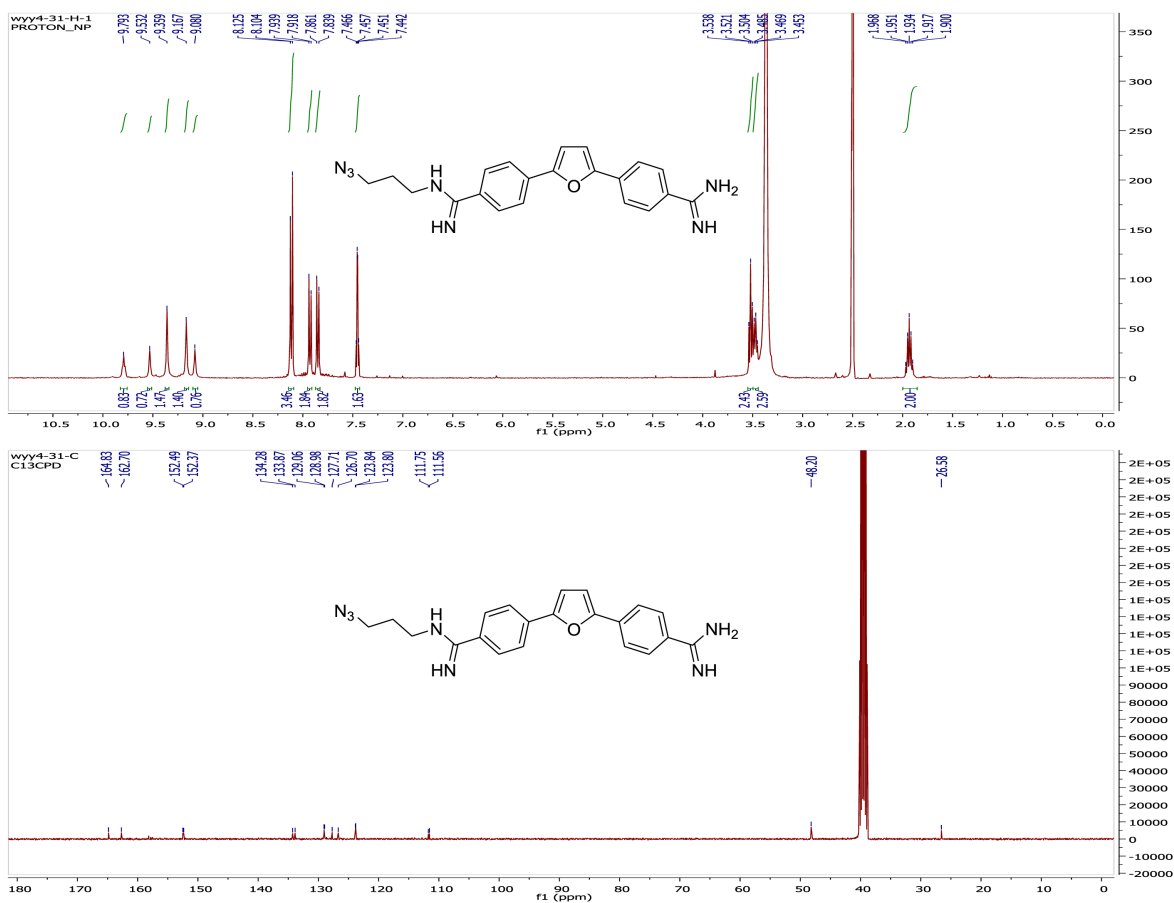

Supplementary Figure 20. <sup>1</sup>H and <sup>13</sup>C-NMR spectra of AU-azide.

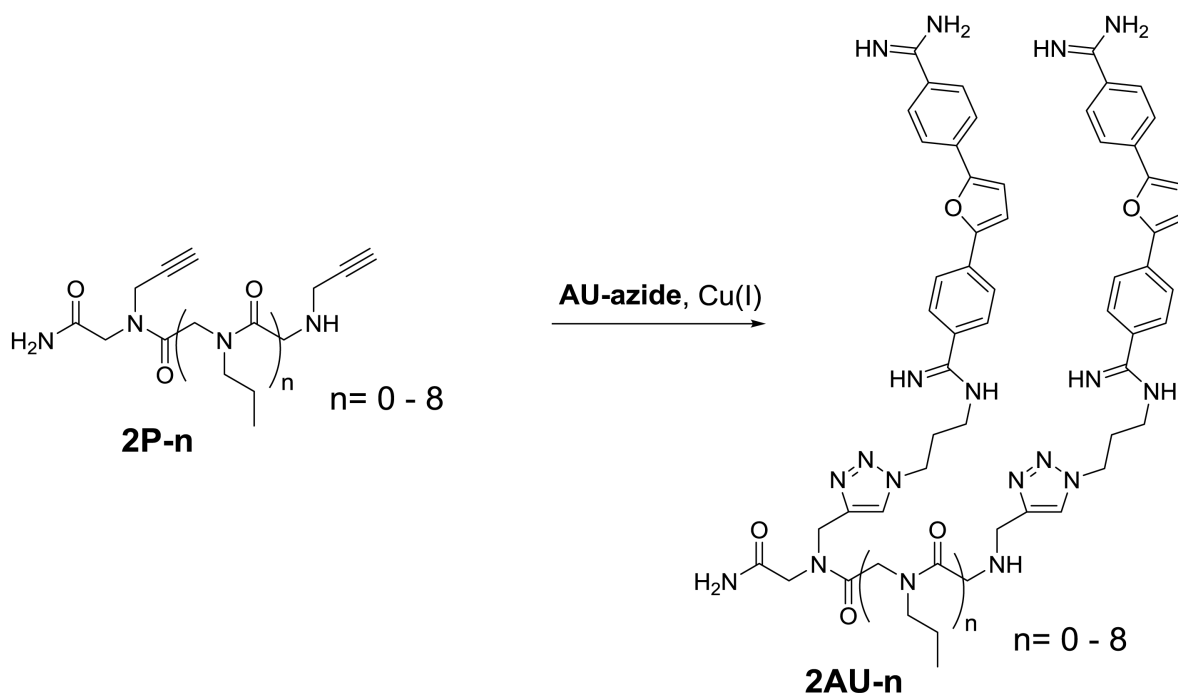

**Supplementary Figure 21.** Syntheses of **2AU-n**.

*General procedure for AU-azide conjugation to peptoids.* The corresponding peptoid backbone, synthesized as previously described,<sup>3</sup> was dissolved in DMF and Cu(I) catalyst, *N,N*-diisopropylethylamine (DIPEA) and **AU-azide** were added to the solution. The mixture was stirred overnight and the conjugate was purified by using reverse phase HPLC using a linear gradient of 20-100% MeOH in H<sub>2</sub>O with 0.1% TFA over 30-60 min.

## HPLC traces and mass spectra for modularly assembled compounds

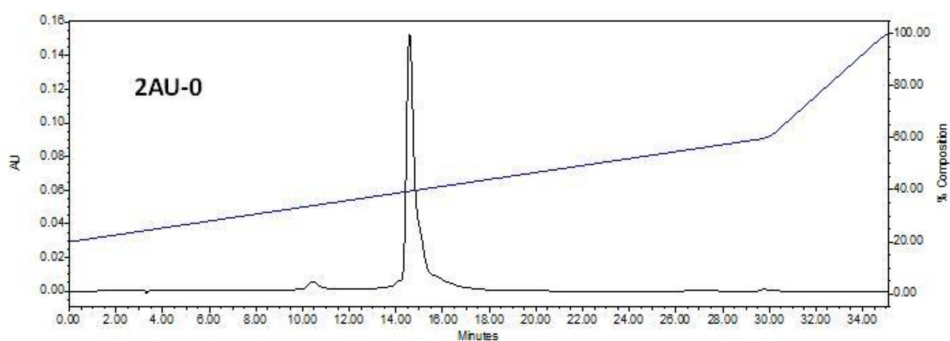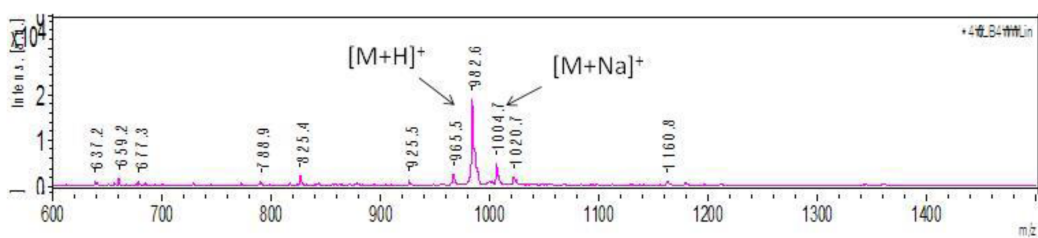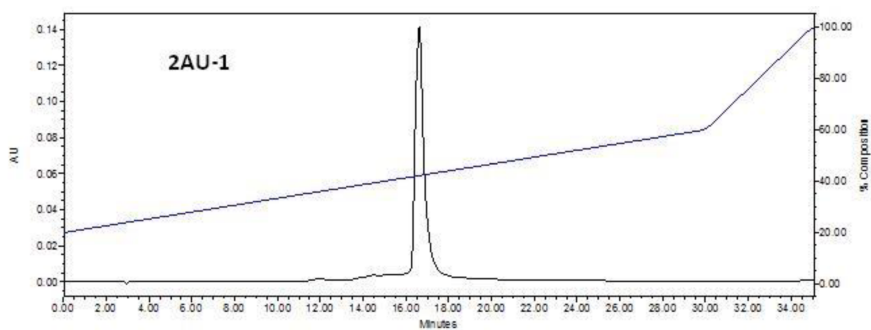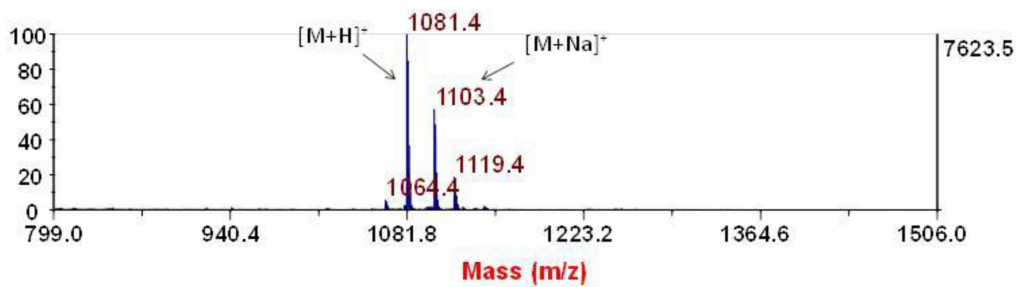

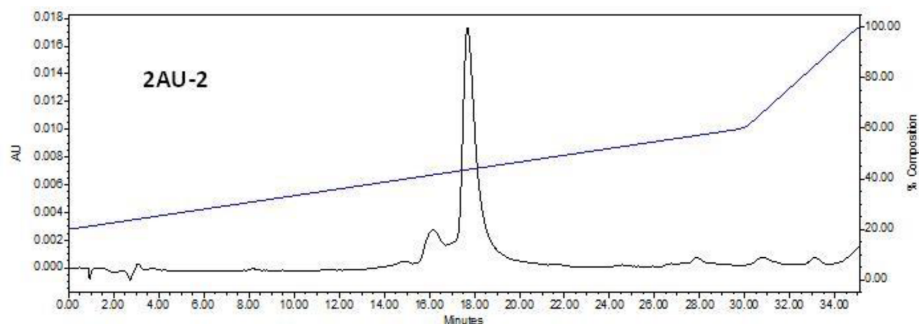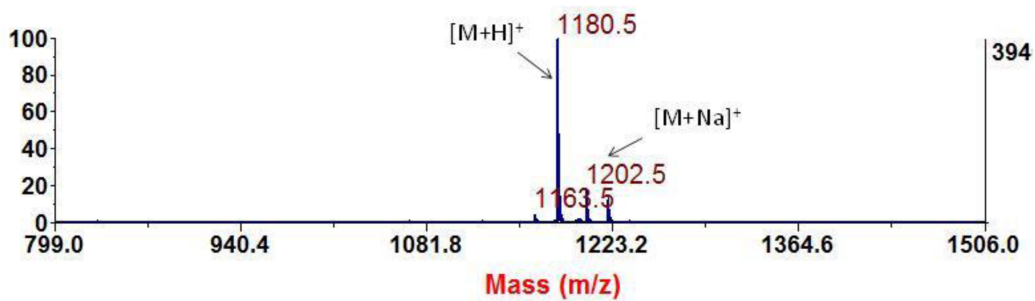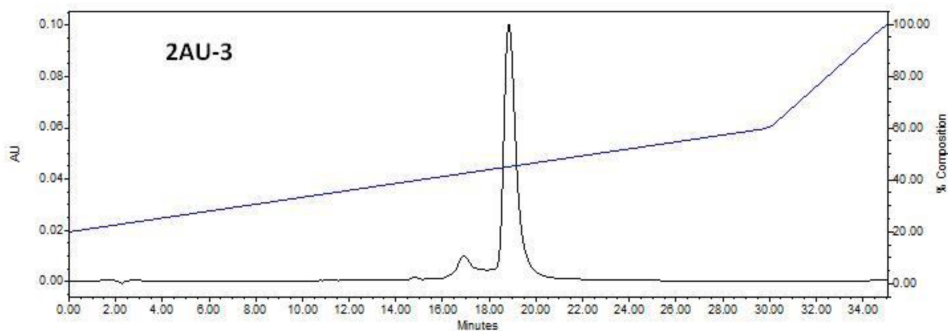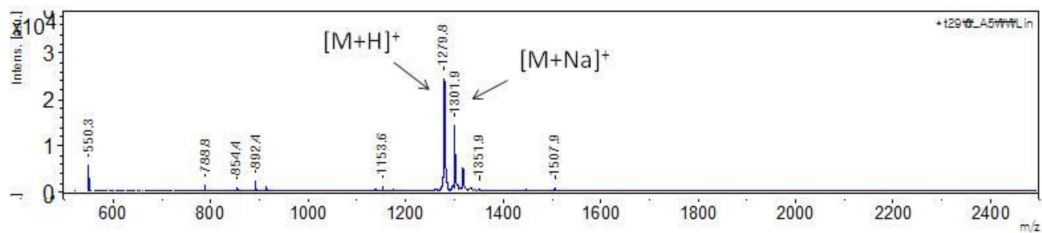



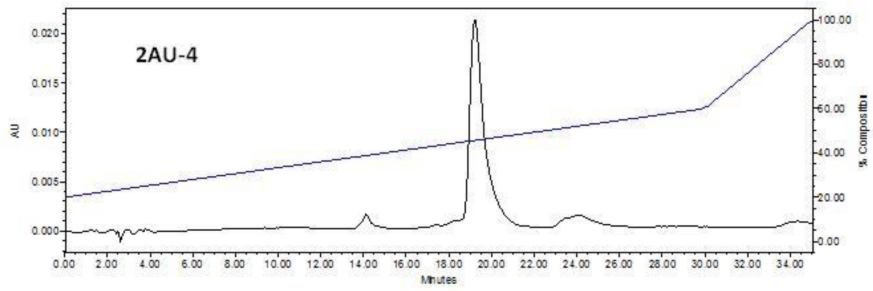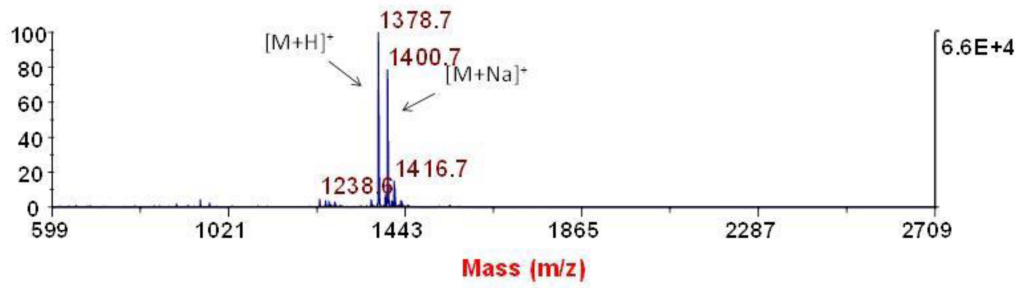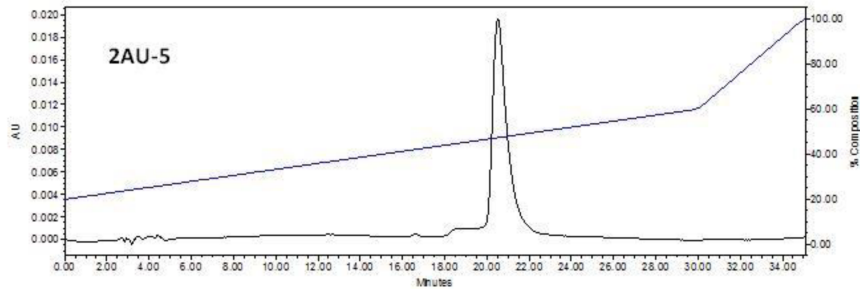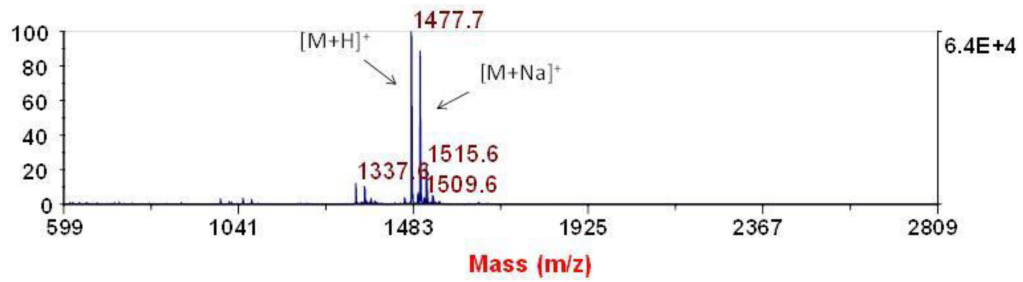

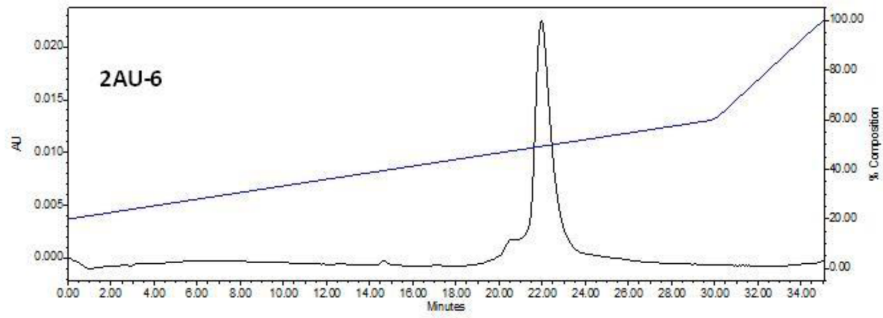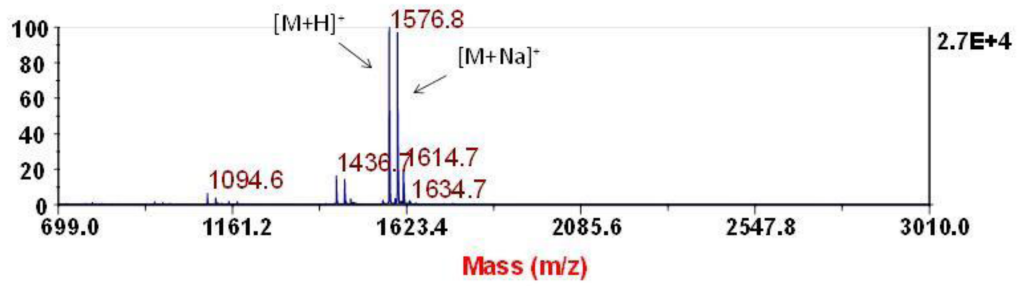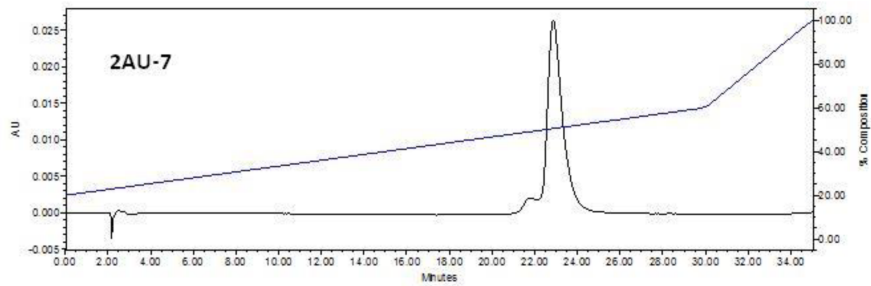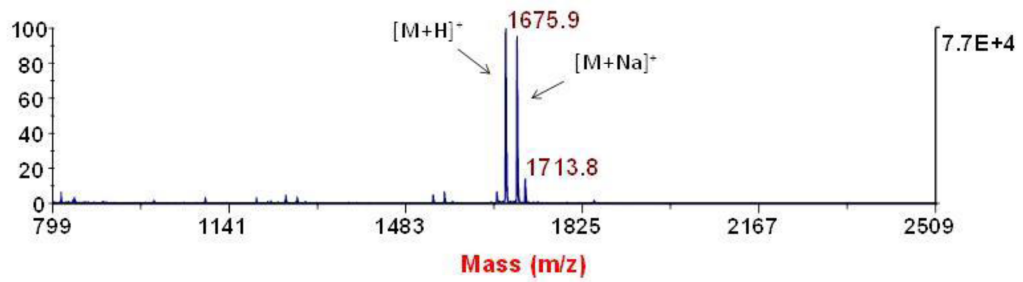

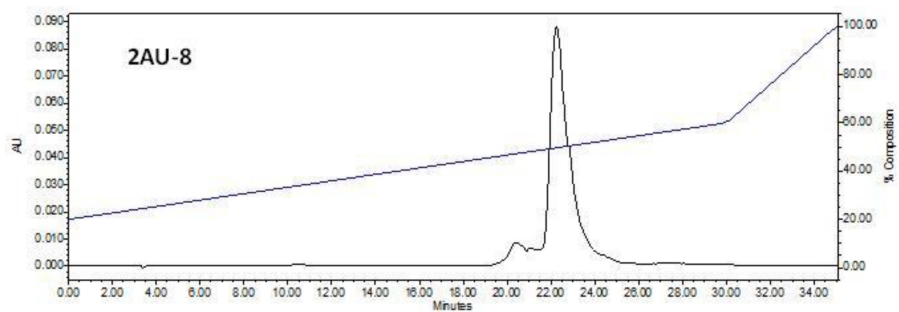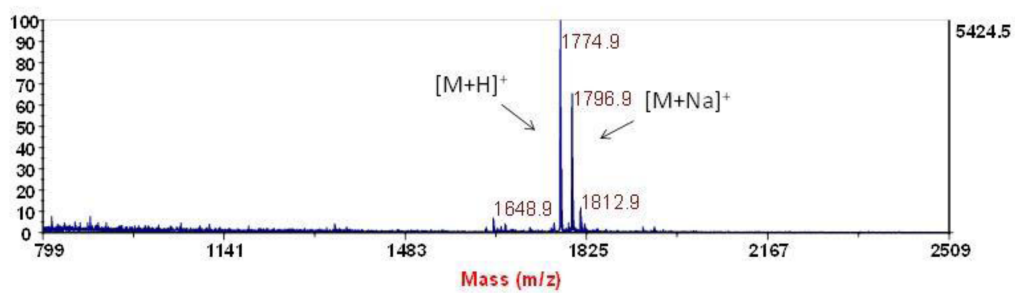

**Supplementary Figure 22.** HPLC chromatograms (blue: linear gradient of MeOH) and MALDI-TOF MS spectra of compounds.

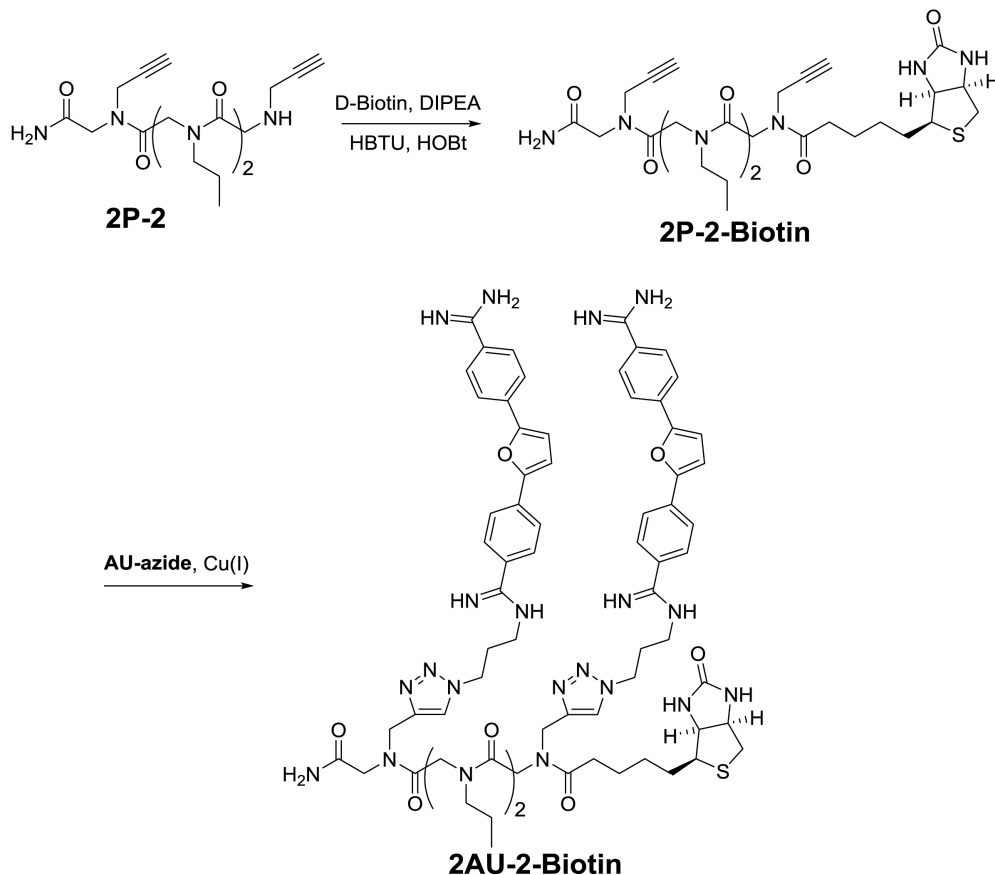

**Supplementary Figure 23. Synthesis of 2AU-2-Biotin.**

### Synthesis of 2AU-2-Biotin

**2P-2-Biotin.** **2P-2** on rink amide resin was shaken with a solution of D-biotin (5 eq.), HBTU (5 eq.) and HOBT (5 eq.) in DMSO at 37 °C for 1 h. **2P-2-Biotin** was cleaved from the resin by treatment with 60:40:1 of TFA:CH<sub>2</sub>Cl<sub>2</sub> H<sub>2</sub>O for 1 h and purified by HPLC.

**2AU-2-Biotin.** **2P-2-Biotin** (10 μmoles) was dissolved in DMF and Cu(I) catalyst (6 μmoles), DIPEA (10 μL) and **AU-azide** (20 μmoles) were added to the solution. The mixture was stirred overnight and **2AU-2-Biotin** (yield: 22%) was purified by using reverse phase HPLC as described above.

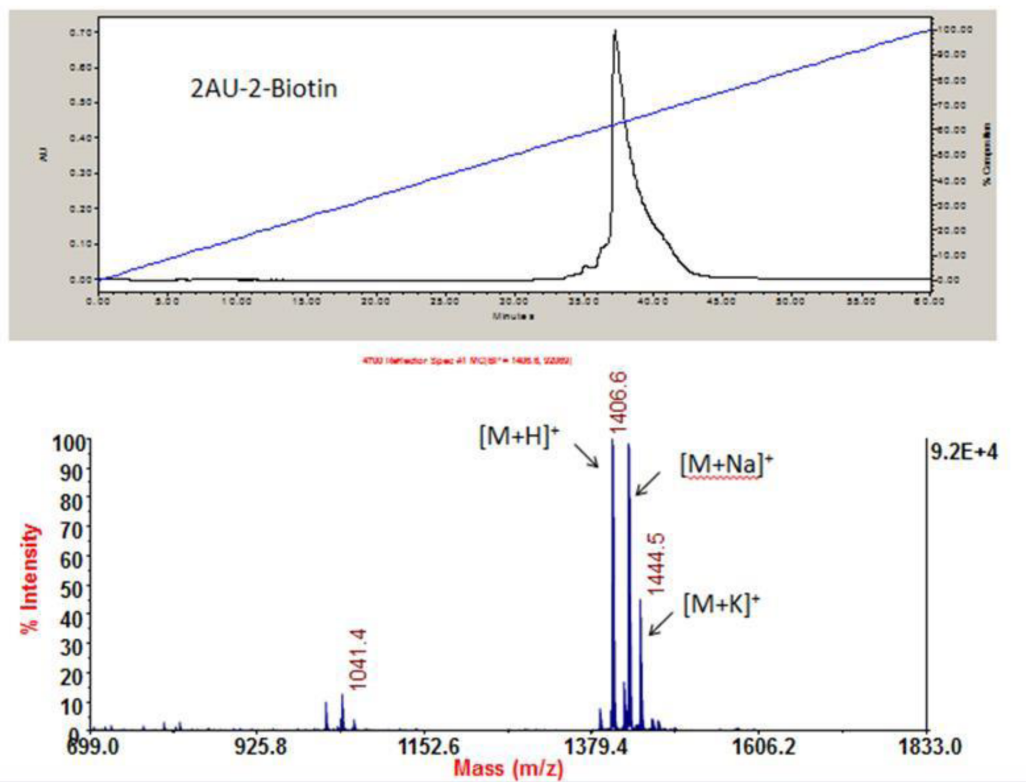

**Supplementary Figure 24.** HPLC chromatogram (blue: linear gradient of MeOH) and MALDI-TOF MS spectrum of 2AU-2-Biotin.

## Supplementary Tables

| Supplementary Table 1. Substructures contained in the 104 compounds screened for binding to RNA base pairs. |           |       |    |           |       |    |           |       |
|-------------------------------------------------------------------------------------------------------------|-----------|-------|----|-----------|-------|----|-----------|-------|
|                                                                                                             | Structure | Count |    | Structure | Count |    | Structure | Count |
| 1                                                                                                           |           | 57    | 18 |           | 7     | 35 |           | 3     |
| 2                                                                                                           |           | 45    | 19 |           | 6     | 36 |           | 2     |
| 3                                                                                                           |           | 37    | 20 |           | 6     | 37 |           | 2     |
| 4                                                                                                           |           | 34    | 21 |           | 6     | 38 |           | 2     |
| 5                                                                                                           |           | 33    | 22 |           | 5     | 39 |           | 2     |
| 6                                                                                                           |           | 25    | 23 |           | 5     | 40 |           | 2     |
| 7                                                                                                           |           | 22    | 24 |           | 5     | 41 |           | 2     |
| 8                                                                                                           |           | 19    | 25 |           | 4     | 42 |           | 2     |
| 9                                                                                                           |           | 18    | 26 |           | 4     | 43 |           | 2     |
| 10                                                                                                          |           | 17    | 27 |           | 3     | 44 |           | 2     |
| 11                                                                                                          |           | 15    | 28 |           | 3     | 45 |           | 2     |

|    |                                                                                     |    |    |                                                                                    |   |    |                                                                                     |   |
|----|-------------------------------------------------------------------------------------|----|----|------------------------------------------------------------------------------------|---|----|-------------------------------------------------------------------------------------|---|
| 12 | 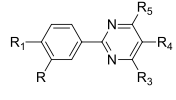   | 13 | 29 |   | 3 | 46 |  | 2 |
| 13 |    | 9  | 30 |   | 3 | 47 |  | 2 |
| 14 |    | 8  | 31 |   | 3 | 48 |  | 2 |
| 15 |    | 8  | 32 |   | 3 | 49 |  | 2 |
| 16 |    | 7  | 33 |   | 3 | 50 |  | 2 |
| 17 |  | 7  | 34 |  | 3 |    |                                                                                     |   |

**Supplementary Table 2.** Structures of hit compounds that bind RNA base pairs (>20% change in fluorescence intensity in the presence and absence of RNA). Asterisk (\*) indicates selective binders.

| Structure                                                                           | Binding RNA(s)          | Structure                                                                            | Binding RNA(s)     |
|-------------------------------------------------------------------------------------|-------------------------|--------------------------------------------------------------------------------------|--------------------|
| 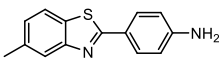   | AAUU/GGCC               |    | AUAU/GGCC/<br>GCGC |
|    | AAUU/AUAU               |    | AAUU/AUAU          |
|    | AAUU/GGCC/<br>GCGC      |    | AAUU               |
|    | AAUU/AUAU/<br>GGCC/GCGC |    | GCGC               |
|   | AAUU/AUAU/<br>GGCC      |   | AAUU/AUAU          |
|  | AAUU/AUAU               |  | AAUU               |
|  | GCGC                    |  | AUAU               |
|  | AAUU/AUAU               |  | AAUU/GGCC/<br>GCGC |
|  | AUAU                    |  | AAUU/AUAU          |



|                                                                                     |                         |                                                                                     |                    |
|-------------------------------------------------------------------------------------|-------------------------|-------------------------------------------------------------------------------------|--------------------|
| 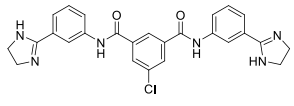   | AAUU/AUAU/<br>GGCC/GCGC |   | GCGC               |
|    | AAUU/AUAU/<br>GGCC/GCGC |   | AUAU/GCGC          |
|    | AUAU                    |   | AUAU/GGCC/<br>GCGC |
|    | GCGC                    |   | GGCC/GCGC          |
|    | GGCC/GCGC               |   | GGCC/GCGC          |
|  | AAUU/AUAU/<br>GGCC/GCGC |  | AAUU/GCGC          |

<sup>a</sup> This compound was selected from the group of compounds with <20 % of fluorescence change.

| Supplementary Table 3. Sequence of primers for qPCR |                               |                                |        |                               |                               |
|-----------------------------------------------------|-------------------------------|--------------------------------|--------|-------------------------------|-------------------------------|
| RNA                                                 | Forward                       | Reverse                        | RNA    | Forward                       | Reverse                       |
| 18S rRNA                                            | GTAACCCGTTGAACCCATT           | CCATCCAATCGGTAGTAGCG           | FLNA   | AGGGGACGGCCCTTTAA<br>T        | GTCGCTCTCAGGAACAG<br>CAG      |
| 28S rRNA                                            | AGAGGTAACGGGTGGGGT<br>C       | GGGGTCGGGAGGAACGG              | RPS6   | CAAGAGAATGAAGGAG<br>GCTAAGG   | AAGCTCGAGAGAGGAA<br>AGTCT     |
| 5.8S rRNA                                           | ACTCGGCTCGTGCCTC              | GCGACGCTCAGACAGG               | Rpl11  | ACTTCGCATCCGCAACT<br>CT       | TGTGAGCTGCTCCAACA<br>CCTT     |
| 45S rRNA                                            | GAACGGTGGTGTGCTGTT            | GCGTCTCGTCTGCTCACT             | ENO1   | GCCTCTGCTCAAAGTCA<br>AC       | AACGATGAGACACCATG<br>ACG      |
| 5S rRNA                                             | GGCCATACCACCTGAACGC           | CAGCACCCGGTATCCAGG             | COX2   | GCAGGGTTGCTGGTGGT<br>AG       | ATTTTCATCTGCTGCTCT<br>GG      |
| 7SK                                                 | CCCCTGCTAGAACCTCCAAA<br>C     | CACATGCAGCGCTCATTT             | GNB2L1 | TGGCTAACTGCAAGCTG<br>AAGAC    | ATCTGGAGAGACAGTCA<br>CCGTG    |
| 7SL                                                 | ATCGGGTGTCCGCACTAAGT<br>T     | CAGCACGGGAGTTTTGACCT           | PKM2   | TACCATGCGGAGACCAT<br>CAA      | AGCAACGGGCCGGTAGA<br>G        |
| ACA16                                               | GGCCCTTATCGAAGCTGCA           | CGGCGACCGTCAAGGA               | CLU    | CCAGTGAAGATGCTCA<br>AC        | CGAGTCAGAAGTGTGGG<br>AAGC     |
| ACA44                                               | GTTTCCAAGGGCTGTGGCT           | TGTAAGTACCTGCGCTGTCA<br>A      | CANX   | GCAACCACTCCCTTCCA<br>T        | TCCGCTCTCTCTTACT<br>GC        |
| ACA61                                               | CCTTTCCATCGGATCTGAA           | CCACATGCCATATACCAGAT<br>TACAAC | RPS9   | AGACCCAGGTCTTCAAG<br>CTG      | ATGAAGGACGGGATGTT<br>CAC      |
| BC200                                               | TGGCTCACGCCTGTAATCC           | CCCAGGCAGGTCTGAACT             | GNAS   | CAGTGGAGATGGGCGTC<br>ACTA     | CGGCGGATGTTCTCAGT<br>GT       |
| HBI-36                                              | CAGCACTGCCAAGTGACCC           | ATATGTACCCAGCTGCATGC<br>AG     | COX1   | CGATGCATACACCACAT<br>GAA      | AGCGAAGGCTTCTCAAA<br>TCA      |
| HBII-85                                             | TGGATCGATGATGAGTCC            | TGGACCTCAGTCCGATGAG<br>A       | B2M    | TGCTGTCTCCATGTTTGA<br>TGTATCT | TCTCTGCTCCCCACCTCT<br>AAGT    |
| HBII-420                                            | ACTGGTCCAGGATGAAACCT<br>AATT  | CCTAGGAGCTGGTCTCAGTC<br>CC     | RPS3   | TCCTCGGAGTTTCCAG<br>C         | TCCTAGGAGGGCTTGTCT<br>GT      |
| U1                                                  | CCATGATCACGAAGGTGGTT<br>T     | ATGCAGTCGAGTTTCCACA<br>T       | EEF1A1 | TGCGGTTTTTGTATCAA<br>A        | AAGAGTGGGGTGGCAG<br>GTATTAG   |
| U2                                                  | TTCTCGCCTTTTGGCTAAG           | CTCCCTGCTCAAAAATCCA            | Rpl27  | TCCAAGGGGATATCCAC<br>AGA      | CATGGGCAAGAAGAAG<br>ATCG      |
| U4                                                  | GCCAATGAGGTTTATCCGAG<br>G     | TCAAAAATTGCCAATGCCG            | RPL37  | AAAACCAGAACATTTATT<br>GCATGA  | TCCGTGAAGGAACAACA<br>CCT      |
| U5                                                  | TGGTTTCTTTCAGATGCAT<br>AAA    | CCAAGGCAAGGCTCAAAAA<br>AT      | RPL3   | CCTCCGTTACCTGGATC<br>T        | CCAAGTCATCCGTGCAT<br>TG       |
| U6                                                  | CTCGCTTCGGCAGCACA             | AACGCTTCACGAATTTGCGT           | EEF2   | GCACGTTGACTCTTAC<br>TG        | CTGGAGATCTGCCTGAA<br>GGA      |
| U12                                                 | GCCCGAATCTCACTGCTAA           | TCGCAACTCCAGGCATC              | ND2    | GCCCTAGAAATAAACAT<br>GCTA     | GGGCTATTCTAGTTTTA<br>TT       |
| U87                                                 | ATGGGATCATGGAGCAGCT<br>G      | TCACACCATGACTGCCACT            | TPT1   | CATGATTATCTACCGGG<br>ACCTCAT  | AACCCGTCGCGATCTC              |
| U105                                                | CCCCTATCTCTCATGTAAC<br>ACATAT | CCCCTATCTTCTCAGAGCG            | TMSB4X | AGACCAGACTTCGCTCG<br>TA       | CTGCTTCTGTTCTCTGTT            |
| tRNA(Lys)                                           | CGGCTAGCTCAGTCGGTAGA          | CCCACGACCTGAGATTAAG            | RPL4   | GCTCTGGCCAGGGTGTCT<br>TTTG    | ATGGCGTATCGTTTTTGG<br>GTTGT   |
| tRNA(Ala)                                           | GGGGGTAGCTCAGTGGT<br>A        | AGGCCTCATAATGCAAAGC            | CCT5   | ACAGCCTTTGCTGCCATT<br>AT      | GCCCTTCTCTCATCATCA<br>AG      |
| tRNA(Cys)                                           | GCTCAGGGGTAGAGCATTG           | ACCGGGGACTTCTGGATCT            | PRDX1  | GGGCACACAAAGGTGAA<br>GTC      | GCTGTTATGCCAGATGG<br>TCAG     |
| tRNA(His)                                           | GCAGTGACTGTATAGTGGTT<br>AGCA  | GTGGCCACAACAGAGTG              | PFN1   | GATCACCGAACATTTCTG<br>GC      | AAACGTTCTGCAACATCA<br>CG      |
| tRNA(Ser)                                           | TAGTCGTGGCCAGTGGTTA           | GGAAACCCCAATGGATTCT<br>A       | Rps24  | AAGACCACACCGGATGT<br>CATC     | TGCCAAAGCCAGTTGCT<br>TG       |
| tRNA(Val)                                           | TGGTTATCACGTTGCTGCTAA         | GTTTCGAACCGGGACCT              | PPIA   | TTATTTGGGTTGCTCCCT<br>TC      | AAGTGTGCCAAATCTGC<br>AAG      |
| tRNA(Arg)                                           | CAGTGGCGCAATGGATAAC           | CAGGAGTCGAACCTGGAATC           | LDHB   | TGGCGTGTGCTATCAGC<br>ATT      | GCTTATCTTCCAAAACAT<br>CCACAAG |
| tRNA(Gln)                                           | TGGTTAGACTCTGGACTCT<br>GA     | AGGTTCCACCGAGATTTGAA           | LGALS1 | AAGCTGCCAGATGGATA<br>CGAA     | CGTCAGCTGCCATGTAG<br>TTGA     |
| tRNA(Ile)                                           | CAGTTGGTTAGAGCGTGGTG          | CCACGACCTTGGCGTTATTA           | PGK1   | ATGGATGAGGTGGTGAA<br>AGC      | CAGTGCTCACATGGCTG<br>ACT      |

|           |                           |                            |        |                                |                              |
|-----------|---------------------------|----------------------------|--------|--------------------------------|------------------------------|
| tRNA(Thr) | TAGCTGGTTAAAGCGCCTGT      | GAACCCAGGATCTCCTGTT<br>ACT | BASP1  | CAATGCCAATCCTCCATT<br>CT       | AACTACAGGTGCACCCA<br>ACC     |
| tRNA(Asn) | CAATGGGTTAGCGCGTTC        | AACCACCAACCTTTCGGTTA       | YBX1   | TGATGGAGGGTGCTGAC<br>AAC       | CCTGCGGAATCGTGGTC<br>TAT     |
| tRNA(Glu) | CTGGTGGTCTAGTGGCTAGG<br>A | CTGGCCGGAATCGAAC           | KRT7   | TGGAGGACTTCAAGAAT<br>AAGTACGAA | TCATGTAGGCAGCATCC<br>ACATC   |
| tRNA(Ini) | CATAACCCAGAGGTCGATGG      | TAGCAGAGGATGGTTTCGAT       | CYTB   | AATTCTCCGATCCGTCCC<br>TA       | GGAGGATGGGGATTATT<br>GCT     |
| tRNA(Phe) | TCAGTTGGGAGAGCGTTACA      | AGGGTTGAACCAGGGAAGTT       | NONO   | CCCTTACAGTTCGAAACC<br>TT       | ATGACTACAGCCCTCTCT<br>AC     |
| tRNA(Trp) | GCGCGTCTGACTCCAGAT        | ACGTGATTTGAACACGCAAC       | ND1    | ATACCCCCATTCCGCTA<br>CGAC      | GTTTGAGGGGAATGCT<br>GGAGA    |
| tRNA(Asp) | TCTGCCTGCATGTGGAGAC       | CCTGTTGGGACTCAAACCTC       | ALDOA  | CGGGAAGAAGGAGAAC<br>CTG        | GACCGCTCGGAGTGTAC<br>TTT     |
| tRNA(Gly) | GCATTGGTGGTTCAAGTGGTA     | ATTGGCCGGAATTGAAC          | P4HB   | GCAAACCTGAGCAACTTC<br>AAA      | TTCTTCAGGCCAAAGAA<br>CTC     |
| tRNA(Leu) | GGTCTAAGGCGCTGGATTAA<br>G | CCCCGAAGAGACTGGAG          | LDHA   | ACCCAGTTTCCACCATGA<br>TT       | CCCAAATGCAAGGAAC<br>ACT      |
| tRNA(Pro) | GGGGTATGATTCTCGTTAG<br>G  | ATTTGAACCCGGGACCTCT        | APP    | GCTGGCTGAACCCAGAG<br>TT        | CCCACTTCCCATTCTGGA<br>CAT    |
| tRNA(Tyr) | CTGGTAGAGCGGAGGACTG<br>T  | GGAATTGAACCAGCGACCTA       | FOLR1  | GCACCACAAGGAAAAGC<br>CAG       | CATTCTTCTCCAGGGTC<br>GAC     |
| tRNA(Sec) | GGCTTCAAACCTGTAGCTGT<br>C | CCGAAATGGAATTGAACCAC       | ACTB   | CTGGAACGGTGAAGGTG<br>ACA       | AAGGGACTTCTGTAAC<br>AATGCA   |
| FTH1      | GGCAAAGTTCTTCAAAGCCA      | CATCAACCGCCAGATCAAC        | RPL13  | CCCGTCCGGAACGTCTAT<br>AA       | CTAGCGAAGGCTTTGAA<br>ATTCTTC |
| GAPDH     | TGCACCACCAACTGCTTAGC      | GGCATGGACTGTGGTCATGA<br>G  | RPS21  | GGCGAGTTCGTGGACCT<br>GTA       | GGATGGATGCGTGGTCC<br>TT      |
| ATP6      | TTCTGGAATGACTCCTTTCG      | TTGGCCAGAATGAACTTGAA       | S100A6 | CTGCAGGATGCTGAAAT<br>TGC       | GGAAGTTCACCTCCTGG<br>TCCTT   |
| RPL8      | AGATGGGTTTGTCAATTCGG      | CAAGAAGACCCGTGTGAAG<br>C   |        |                                |                              |

**Supplementary Table 4.** Characterization of modularly assembled molecules including HPLC retention times, and calculated and observed masses.

| Compound            | Molecular Formula                                                | t <sub>R</sub> (min) <sup>a</sup> | Mass (Calculated) | MALDI-TOF (+)-Mass (Found) |
|---------------------|------------------------------------------------------------------|-----------------------------------|-------------------|----------------------------|
| <b>2AU-0</b>        | C <sub>52</sub> H <sub>55</sub> N <sub>17</sub> O <sub>4</sub>   | 14.6                              | 981.5 (M)         | 982.6 (M+H)                |
| <b>2AU-1</b>        | C <sub>57</sub> H <sub>64</sub> N <sub>18</sub> O <sub>5</sub>   | 16.6                              | 1080.5 (M)        | 1081.4 (M+H)               |
| <b>2AU-2</b>        | C <sub>62</sub> H <sub>73</sub> N <sub>19</sub> O <sub>6</sub>   | 17.7                              | 1179.6 (M)        | 1180.5 (M+H)               |
| <b>2AU-3</b>        | C <sub>67</sub> H <sub>82</sub> N <sub>20</sub> O <sub>7</sub>   | 18.8                              | 1278.7 (M)        | 1279.8 (M+H)               |
| <b>2AU-4</b>        | C <sub>72</sub> H <sub>91</sub> N <sub>21</sub> O <sub>8</sub>   | 19.2                              | 1377.7 (M)        | 1378.7 (M+H)               |
| <b>2AU-5</b>        | C <sub>77</sub> H <sub>100</sub> N <sub>22</sub> O <sub>9</sub>  | 20.5                              | 1476.8 (M)        | 1477.7 (M+H)               |
| <b>2AU-6</b>        | C <sub>82</sub> H <sub>109</sub> N <sub>23</sub> O <sub>10</sub> | 22.0                              | 1575.9 (M)        | 1576.8 (M+H)               |
| <b>2AU-7</b>        | C <sub>87</sub> H <sub>118</sub> N <sub>24</sub> O <sub>11</sub> | 22.9                              | 1674.9 (M)        | 1675.9 (M+H)               |
| <b>2AU-8</b>        | C <sub>92</sub> H <sub>127</sub> N <sub>25</sub> O <sub>12</sub> | 22.3                              | 1774.0 (M)        | 1774.8 (M+H)               |
| <b>2AU-2-Biotin</b> | C <sub>72</sub> H <sub>87</sub> N <sub>21</sub> O <sub>8</sub> S | 38.0 <sup>b</sup>                 | 1405.7 (M)        | 1406.6 (M+H)               |

<sup>a</sup> gradient of 20-60% MeOH in H<sub>2</sub>O with 0.1% TFA over 30 min  
<sup>b</sup> gradient of 0-100% MeOH in H<sub>2</sub>O with 0.1% TFA over 60 min

## Supplementary References

1. Fu HY, Doucet H. Methyl 2-Furoate: An Alternative Reagent to Furan for Palladium-Catalysed Direct Arylation. *Eur. J. Org. Chem.* **2011**, 7163-7173 (2011).
2. Das BP, Boykin DW. Synthesis and antiprotozoal activity of 2,5-bis(4-guanylphenyl)furans. *J. Med. Chem.* **20**, 531-536 (1977).
3. Pushechnikov A, *et al.* Rational design of ligands targeting triplet repeating transcripts that cause RNA dominant disease: application to myotonic muscular dystrophy type 1 and spinocerebellar ataxia type 3. *J. Am. Chem. Soc.* **131**, 9767-9779 (2009).
